# Supplementary material for: The Dietary Isoflavone Daidzein Reduces Expression of Pro-Inflammatory Genes through PPARα/γ and JNK Pathways in Adipocyte and Macrophage Co-Cultures
Source: PubMed Central journal article supplement (PMC4763373; doi:10.1371/journal.pone.0149676), 2016-02-22
Supplement: pone.0149676.s002.pdf [file pone.0149676.s002.pdf]

Supporting Table 1. Sequences of primers for each gene

| Target<br>(Accession #)                        | Forward                 | Reverse                 |
|------------------------------------------------|-------------------------|-------------------------|
| <i>Adipoq</i> (Adiponectin)<br>(NM_009605.4)   | ATGGCAGAGATGGCACTCCT    | CCTTCAGCTCCTGTCATTCCA   |
| <i>Ccl2</i> (NM_011333.3)                      | CCACTCACCTGCTGCTACTCAT  | TGGTGATCCTCTTGTAGCTCTCC |
| <i>Il6</i> (NM_031168.1)                       | ACAACCACGGCCTTCCCTACTT  | CACGATTTCCCAGAGAACATGTG |
| <i>Tnf</i> (NM_013693.3)                       | ACCCTCACACTCAGATCATCTTC | TGGTGGTTTGCTACGACGT     |
| <i>Actb</i> ( $\beta$ -Actin)<br>(NM_007393.3) | CTAAGGCCAACCGTGAAAAG    | ACCAGAGGCATACAGGGACA    |
