# Supplementary material for: The Dietary Isoflavone Daidzein Reduces Expression of Pro-Inflammatory Genes through PPARα/γ and JNK Pathways in Adipocyte and Macrophage Co-Cultures
Source: PubMed Central journal article supplement (PMC4763373; doi:10.1371/journal.pone.0149676), 2016-02-22
Supplement: pone.0149676.s003.pdf [file pone.0149676.s003.pdf]

Supporting Table 2. Antibodies used in this study

| Primary antibodies            |            |              |                             |                  |          |
|-------------------------------|------------|--------------|-----------------------------|------------------|----------|
| antibody                      | mono/poly  | host species | supplier                    | catalogue number | dilution |
| JNK                           | polyclonal |              | Santa Cruz<br>Biotechnology | SC-571           | 1:3000   |
| pJNK                          | monoclonal |              | Cell Signaling              | #4668            | 1:3000   |
| p65                           | polyclonal | rabbit       | Santa Cruz<br>Biotechnology | SC-372           | 1:3000   |
| pp65                          | monoclonal |              | Cell Signaling              | #3033            | 1:3000   |
| I $\kappa$ B                  | polyclonal |              | Santa Cruz<br>Biotechnology | SC-371           | 1:3000   |
| $\beta$ -actin                | monoclonal | mouse        | Santa Cruz<br>Biotechnology | SC-47778         | 1:3000   |
| Secondary antibodies          |            |              |                             |                  |          |
| antibody                      | mono/poly  | host species | supplier                    | catalogue number | dilution |
| HRP-linked<br>anti-rabbit IgG | polyclonal | goat         | Cell signaling              | #7074            | 1:7000   |
| HRP-linked<br>anti-mouse IgG  | polyclonal | horse        | Cell Signaling              | #7076            | 1:10000  |
